# Supplementary material for: Predictors of RSV LRTI Hospitalization in Infants Born at 33 to 35 Weeks Gestational Age: A Large Multinational Study (PONI)
Source: PubMed Central journal article supplement (PMC4910988; doi:10.1371/journal.pone.0157446), 2016-06-16
Supplement: pone.0157446.s001.pdf [file pone.0157446.s001.pdf]

**S1 Table. Participating institutions and corresponding ethics committees/review boards**

| Institution                                                                                   | Ethics Committee/Review Board                                                                                      |
|-----------------------------------------------------------------------------------------------|--------------------------------------------------------------------------------------------------------------------|
| University Clinic for Pediatric Medicine, General Hospital Vienna - Medical University Vienna | Ethikkommission der Medizinischen Universität Wien                                                                 |
| University Clinic for Pediatric Medicine, Medical University Graz                             | Ethikkommission der Medizinischen Universität Graz                                                                 |
| Department for Pediatric Medicine, Medical University Innsbruck                               | Ethikkommission der Medizinischen Universität Innsbruck                                                            |
| University Clinic for Pediatric Medicine, Paracelsus Medical University                       | Ethikkommission für das Bundesland Salzburg                                                                        |
| Salmaniya Medical Complex                                                                     | Office of Assistant Undersecretary for Training and Planning                                                       |
| University Hospital Clinical Center Banja Luka                                                | Ethics Committee of the University Hospital Clinical Center Banja Luka                                             |
| University Clinical Center Tuzla                                                              | Ethics Committee of the University Clinical Center Tuzla                                                           |
| University Clinical Hospital Mostar                                                           | Ethics Committee of the University Clinical Hospital Mostar                                                        |
| Clinical University Center Sarajevo                                                           | Ethics Committee of the University Clinical Center Sarajevo                                                        |
| UMBAL Georgi Stranski                                                                         | Ethics Committee UMBAL Georgi Stranski                                                                             |
| SBALAG Maichin Dom                                                                            | Ethics Committee SBALAG Maichin Dom                                                                                |
| SBALDB EAD                                                                                    | Ethics Committee SBALDB EAD                                                                                        |
| UMBAL St. Kirkovitch                                                                          | Ethics Committee UMBAL St. Kirkovitch                                                                              |
| UMBAL Sveti Georgi EAD                                                                        | Ethics Committee UMBAL Sv Georgi EAD                                                                               |
| The Institute for the Care of Mother and Child, Neonatological Ward                           | Etická Komise, ÚPMD                                                                                                |
| Pilsen Faculty Hospital, Edvarda Beneše                                                       | Ethics Committee, tř. Dr.E.Beneše                                                                                  |
| Ain Shams University Faculty of Medicine Pediatric Department                                 | Ethical Committee of Ain Shams University                                                                          |
| Cairo University Faculty of Medicine Pediatric Department                                     | Ethical Council of Pediatric Department Cairo University                                                           |
| Tartu University Hospital                                                                     | Tallinn Medical Research Ethics Committee                                                                          |
| West Tallinn Central Hospital                                                                 | Tallinn Medical Research Ethics Committee                                                                          |
| East Tallinn Central Hospital                                                                 | Tallinn Medical Research Ethics Committee                                                                          |
| Hôpital Clocheville                                                                           | Comité consultatif sur le traitement de l'information en matière de recherche dans le domaine de la santé (CCTIRS) |
| Hôpital Charles Nicolle                                                                       | Comité consultatif sur le traitement de l'information en matière de recherche dans le domaine de la santé (CCTIRS) |

|                                                                                    |                                                                                                                    |
|------------------------------------------------------------------------------------|--------------------------------------------------------------------------------------------------------------------|
| CHU Bocage                                                                         | Comité consultatif sur le traitement de l'information en matière de recherche dans le domaine de la santé (CCTIRS) |
| Hôpital Arnaud De Villeneuve                                                       | Comité consultatif sur le traitement de l'information en matière de recherche dans le domaine de la santé (CCTIRS) |
| Hôpital De La Conception                                                           | Comité consultatif sur le traitement de l'information en matière de recherche dans le domaine de la santé (CCTIRS) |
| King Abdullah University Hospital                                                  | King Abdullah University Hospital                                                                                  |
| University Children's Hospital, Riga                                               | Riga East Clinical University Hospital Support Foundation's Medical and Biomedical Research Ethics Committee       |
| Hotel-Dieu de France                                                               | Comite d'ethique - Universite Saint Joseph                                                                         |
| Hammoud Hospital - University Medical Center                                       | Hammoud Hospital UMC Institutional review Board                                                                    |
| Makassed General Hospital                                                          | Makassed General Hospital Institutional Review Board                                                               |
| American University of Beirut                                                      | American University of Beirut Institutional Review Board                                                           |
| Children's Hospital, Affiliate of Vilnius University Hospital Santariskiu Klinikos | Lithuanian Bioethics Committee                                                                                     |
| Hospital of Lithuanian University of Health Sciences, Kaunas Clinics               | Lithuanian Bioethics Committee                                                                                     |
| Hospital General Regional de León la SSA                                           | Comité de Ética en Investigación, Hospital León                                                                    |
| Hospital Metropolitano "Dr. Bernardo Sepúlveda"                                    | Comité de Ética en Investigación, Hospital Metropolitano Dr. Bernardo Sepúlveda                                    |
| Akershus University Hospital                                                       | REC North; Regional Committees for Medical and Health Research Ethics                                              |
| St. Olavs University Hospital                                                      | REC North; Regional Committees for Medical and Health Research Ethics                                              |
| Stavanger University Hospital                                                      | REC North; Regional Committees for Medical and Health Research Ethics                                              |
| Oslo University Hospital Rikshospitalet                                            | REC North; Regional Committees for Medical and Health Research Ethics                                              |
| Oslo University Hospital Ulevål                                                    | REC North; Regional Committees for Medical and Health Research Ethics                                              |
| Sultan Qaboos University Hospital                                                  | Sultan Qaboos University Ethics Committee                                                                          |
| Hospital Prof. Doutor Fernando Fonseca, E.P.E.                                     | Comissão de Ética do Hospital Prof. Fernando Fonseca , E.P.E.                                                      |
| Centro Hospitalar São João                                                         | Comissão de Ética do Hospital de São João                                                                          |
| Hospital de S. Francisco Xavier - CHLO, E.P.E.                                     | Comissão de Ética do Centro Hospitalar de Lisboa Ocidental, E.P.E - Hospital Egas Moniz                            |

|                                                                                                                                                   |                                                                                                                                |
|---------------------------------------------------------------------------------------------------------------------------------------------------|--------------------------------------------------------------------------------------------------------------------------------|
| GUZ "Clinical Hospital #5"                                                                                                                        | Independent Interdisciplinary Committee for Ethical Review of Clinical Studies                                                 |
| MAUZ of Irkutsk GIMDKB. OPNND                                                                                                                     | Independent Interdisciplinary Committee for Ethical Review of Clinical Studies                                                 |
| GBUZ City Children Hospital #1 MZ RT                                                                                                              | Independent Interdisciplinary Committee for Ethical Review of Clinical Studies                                                 |
| FGBU "NTSZD" RAMS                                                                                                                                 | Independent Interdisciplinary Committee for Ethical Review of Clinical Studies                                                 |
| Pediatric Infectious Clinical Hospital #6                                                                                                         | Independent Interdisciplinary Committee for Ethical Review of Clinical Studies                                                 |
| Moscow Research Institute of Pediatrics and Pediatric Surgery - Correction Center of Premature Infants                                            | Independent Interdisciplinary Committee for Ethical Review of Clinical Studies                                                 |
| FGBU NC AGiP n.a. V.I. Kulakova Minzdrava RF                                                                                                      | Independent Interdisciplinary Committee for Ethical Review of Clinical Studies                                                 |
| Municipal Budget Health Care Institution of Novosibirsk "City Perinatal Center"                                                                   | Independent Interdisciplinary Committee for Ethical Review of Clinical Studies                                                 |
| Correction Center of Samara                                                                                                                       | Independent Interdisciplinary Committee for Ethical Review of Clinical Studies                                                 |
| Children Hospital #17                                                                                                                             | Independent Interdisciplinary Committee for Ethical Review of Clinical Studies                                                 |
| LPU GUZ Perinatal Center of Saratov                                                                                                               | Independent Interdisciplinary Committee for Ethical Review of Clinical Studies                                                 |
| Independent Regional State Health Care Institution Tomsk Regional Perinatal Center                                                                | Independent Interdisciplinary Committee for Ethical Review of Clinical Studies                                                 |
| BU "Presidential Perinatal Center"                                                                                                                | Independent Interdisciplinary Committee for Ethical Review of Clinical Studies                                                 |
| MBUZ Children Hospital #8                                                                                                                         | Independent Interdisciplinary Committee for Ethical Review of Clinical Studies                                                 |
| State Educational Institution of Higher Professional Education "Chita State Medical Academy" of the Ministry of Health Care of Russian Federation | Independent Interdisciplinary Committee for Ethical Review of Clinical Studies                                                 |
| King Abdulaziz Medical City National Guard Hospital                                                                                               | KING ABDULLAH INTERNATIONAL MEDICAL RESEARCH CENTER, King Abdul-Aziz , Medical City, Ministry of National Guard Health Affairs |
| King Fahd Medical City                                                                                                                            | King Fahd Medical City                                                                                                         |
| Martin University Hospital                                                                                                                        | Etická komisia Univerzitetnej nemocnice Martin                                                                                 |
| Hospital for Gynecology and Obstetrics Postojna                                                                                                   | Republic of Slovenia National Medical Ethics Committee (NMEC)                                                                  |
| Hospital for Gynecology and Obstetrics Kranj                                                                                                      | Republic of Slovenia National Medical Ethics Committee (NMEC)                                                                  |

|                                                                                                                                                        |                                                                                              |
|--------------------------------------------------------------------------------------------------------------------------------------------------------|----------------------------------------------------------------------------------------------|
| Samsung Medical Center                                                                                                                                 | Samsung Medical Center Institutional Review Board                                            |
| Seoul National University Hospital                                                                                                                     | Seoul National University Hospital Institutional Review Board                                |
| Asan Medical Center                                                                                                                                    | Asan Medical Center Institutional Review Board                                               |
| Neonatology Department, Astrid Lindgren's Hospital, Danderyd, Karolinska University Hospital                                                           | Neonatology Department, Astrid Lindgren's Hospital, Danderyd, Karolinska University Hospital |
| Neonatal Intensive Care Unit, Linköping University Hospital                                                                                            | Neonatal Intensive Care Unit, Linköping University Hospital                                  |
| Sachs Children and Youth Hospital                                                                                                                      | Sachs Children and Youth Hospital                                                            |
| Division of Infectious Diseases and Hospital Epidemiology, and Children's Research Center, University Children's Hospital Zurich, University of Zurich | Kantonale Ethikkommission Zürich                                                             |
| University of Basel Children's Hospital                                                                                                                | Ethikkommission Nordwest- und Zentralschweiz (EKNZ)                                          |
| Children's Hospital of Geneva, Department of Pediatrics, University Hospitals of Geneva & Geneva Medical School                                        | Commission cantonale d'éthique de la recherche (CCER)                                        |
